# Supplementary material for: Composition-tuned SnxGe1−xS nanocrystals for enhanced-performance lithium ion batteries
Source: Royal Society of Chemistry journal article supplement (doi:10.1039/c4ra08886g), 2014-01-01

# *Supplementary Information*

## **Composition-Tuned $\text{Sn}_x\text{Ge}_{1-x}\text{S}$ Ternary Alloy Nanocrystals for Enhanced-Performance Lithium Ion Batteries**

Young Rok Lim, Hyung Soon Im, Yong Jae Cho, Jeunghee Park, Eun Hee Cha, and Won Il Cho

**Table S1.** Pressure of precursors in the closed reactor for the synthesis of  $\text{Sn}_x\text{Ge}_{1-x}\text{S}$  NCs.

| No. | $x$ (Sn) | Pressure (Torr)            |                            |                      |
|-----|----------|----------------------------|----------------------------|----------------------|
|     |          | $\text{Ge}(\text{CH}_3)_4$ | $\text{Sn}(\text{CH}_3)_4$ | $\text{H}_2\text{S}$ |
| 1   | 0        | 20                         | 0                          | 40                   |
| 2   | 0.05     | 39                         | 1                          | 60                   |
| 3   | 0.1      | 38                         | 2                          | 60                   |
| 4   | 0.4      | 30                         | 10                         | 60                   |
| 5   | 0.6      | 20                         | 20                         | 60                   |
| 6   | 0.8      | 10                         | 30                         | 60                   |
| 7   | 0.9      | 4                          | 36                         | 60                   |
| 8   | 1        | 0                          | 20                         | 40                   |

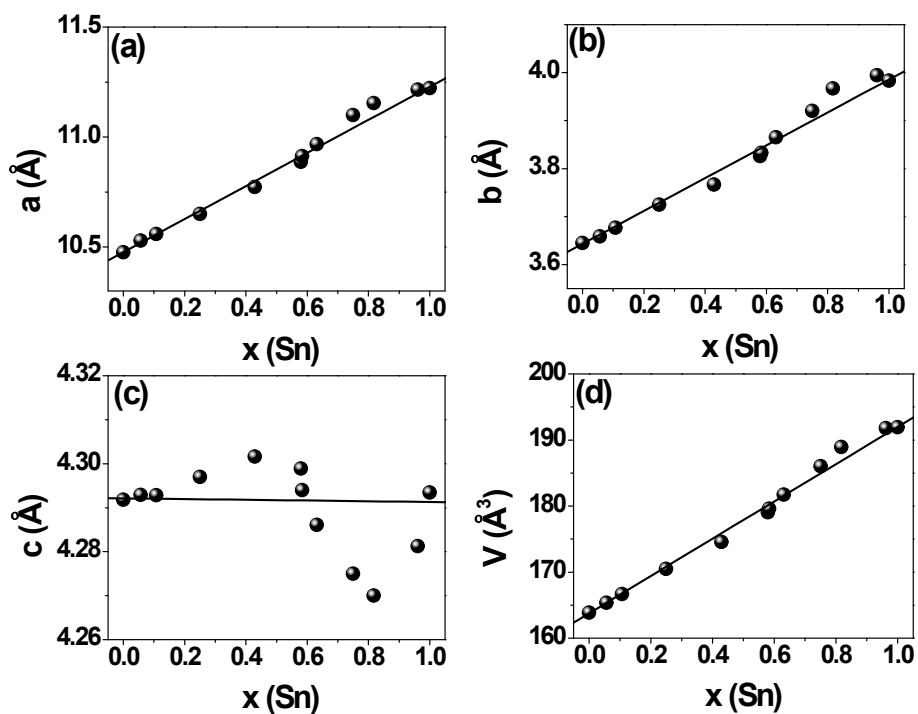

**Figure S1.** Dependence of the lattice constants (a)  $a$ , (b)  $b$ , (c)  $c$ , and (d) the unit cell volume on Sn content ( $x$ ) in  $\text{Sn}_x\text{Ge}_{1-x}\text{S}$  NCs (Reference 34).

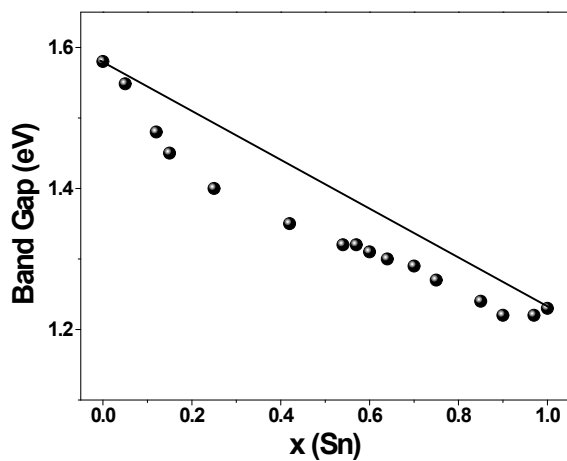

**Figure S2.** Dependence of the indirect band gap on the content ( $x$ ) of Sn. The indirect band gap of each composition was obtained using the Kubelka–Munk (K–M) transformation  $[F(\nu)h\nu]^{1/2}$  versus photon energy, where  $F(\nu)$  is the UV-visible diffuse reflectance (Reference 34).

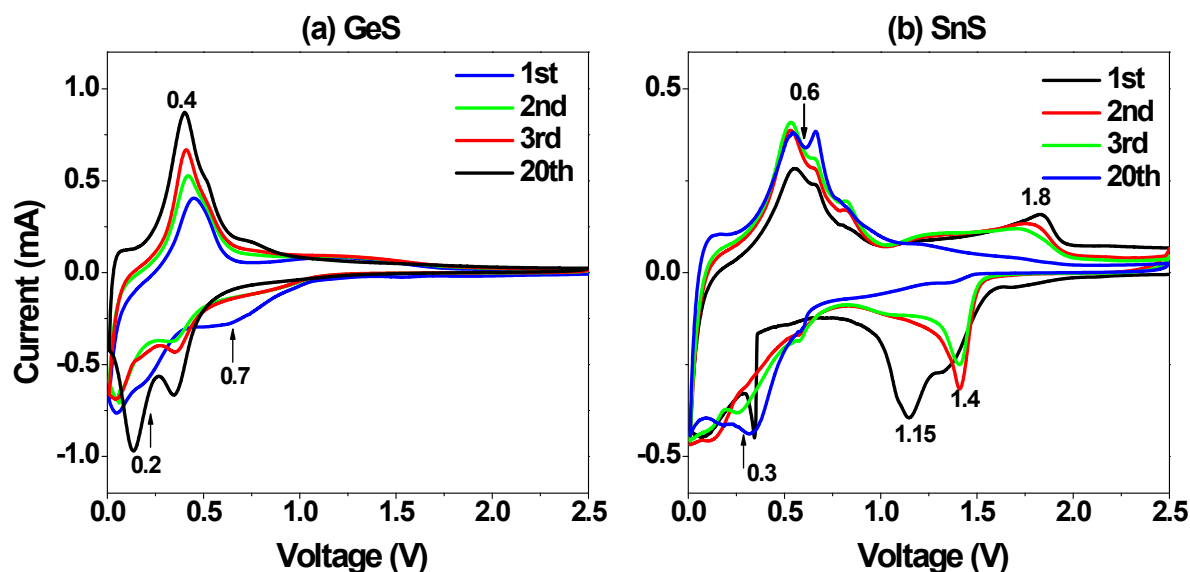

**Figure S3.** CV curve for (a) GeS and (b) SnS NC electrodes at a scan rate of  $0.1 \text{ mVs}^{-1}$  over the voltage range 0.01 to 2.5 V for 20 cycles.

(a) GeS exhibits a cathodic peak at 0.7 V in the first potential sweep that disappears in the second sweep. This peak is assigned to the decomposition of GeS into Ge and  $\text{Li}_2\text{S}$ . The alloying (cathodic scan)/dealloying (anodic scan) signature of Li and Ge ( $\text{Ge} + \text{Li} \leftrightarrow \text{Li}_x\text{Ge}$ ) appears as a pair of reduction-oxidation (redox) current peaks at potentials of around 0.2 V and 0.4 V, respectively. (b) SnS exhibits a cathodic peak at 1.15 V in the first potential sweep that disappears in the second sweep. This peak is ascribed to the decomposition of SnS into Sn and  $\text{Li}_2\text{S}$ . A pair of redox peaks at 1.4 and 1.8 V, whose intensity decreases in subsequent sweeps, is present in the second sweep. We suggest that  $\text{Li}_x\text{SnS}$  is produced in the first potential sweep and undergoes alloying/dealloying processes such as  $\text{Li}_x\text{SnS} + (2-x)\text{Li} \leftrightarrow \text{Sn} + \text{Li}_2\text{S}$ . A pair of redox peaks appears at potentials of around 0.3 and 0.6 V because of the alloying/dealloying reactions of  $\text{Sn} + \text{Li} \leftrightarrow \text{Li}_x\text{Sn}$ . To avoid the complex alloying/dealloying reactions that occur at voltages higher than 1.5 V, the voltage was scanned in the range 0.01–1.5 V.

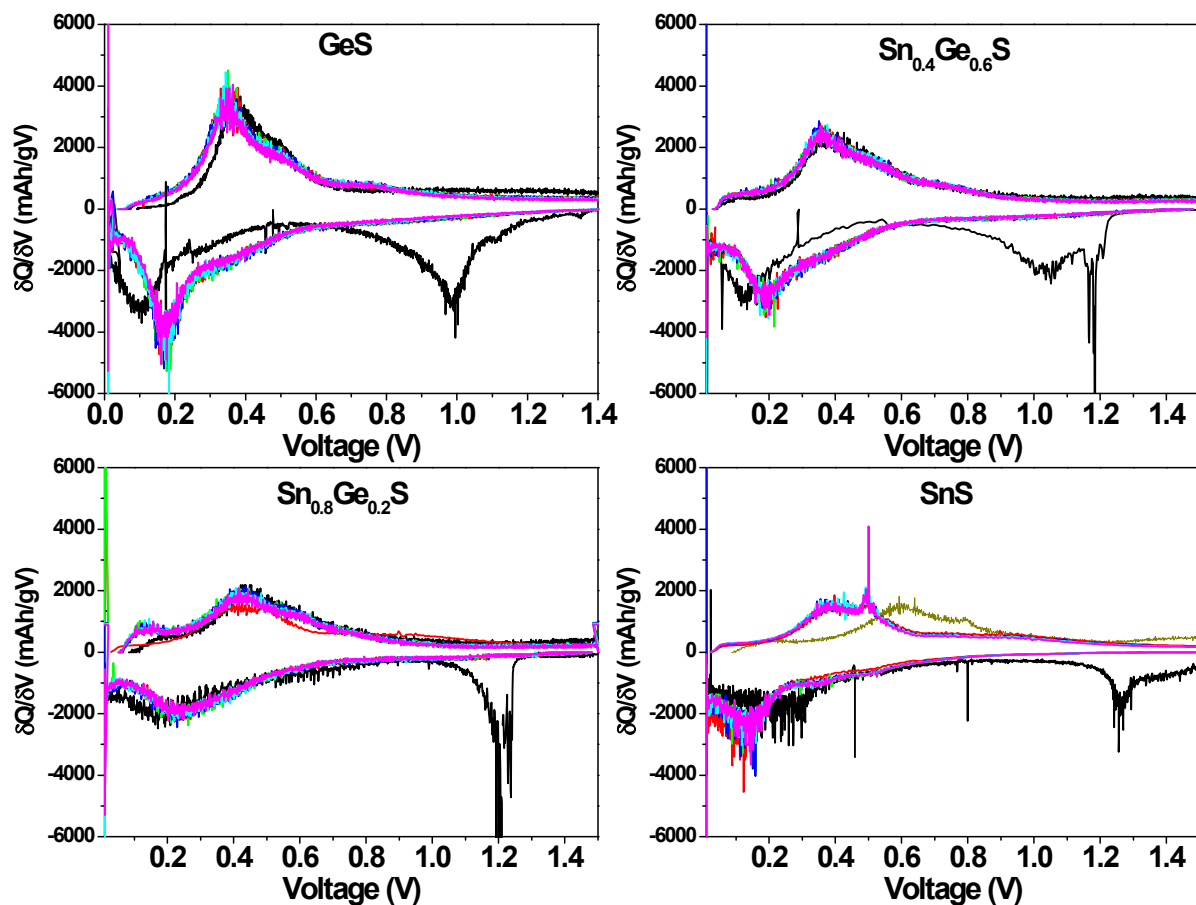

**Figure S4.** Differential capacity profiles of coin-type half-cells using  $\text{Sn}_x\text{Ge}_{1-x}\text{S}$  NCs, where (a)  $x = 0$ , (b)  $x = 0.4$ , (c)  $x = 0.8$ , and (d)  $x = 1$ , for 1, 2, 5, 10, 30, and 70 cycles tested between 0.01 and 1.5 V at a rate of 0.1C. All shows a pair of reduction-oxidation (redox) current peaks at potentials of around 0.2 V and 0.4 V, respectively, after the first cycle. Since the voltage was scanned in the range 0.01–1.5 V, there were no peaks of complex alloying/dealloying reactions that occur at voltages higher than 1.5 V, which was observed in the CV data (Figure S3).

**Figure S5.** The equivalent circuit model of the studied system before the cycling test. The impedance spectra parameters obtained via non-linear least squares-fit analysis are listed in Table S2.

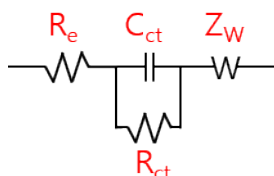

**Table S2.** Impedance parameters (before cycle) from the LIBs using  $\text{Sn}_x\text{Ge}_{1-x}\text{S}$  NCs, where  $x = 0, 0.1, 0.8$ , and 1.

| $x$ | $R_e$ ( $\Omega$ ) | $R_{ct}$ ( $\Omega$ ) | $C_{ct}$ | $Z_w$ ( $\Omega$ ) |
|-----|--------------------|-----------------------|----------|--------------------|
| 0   | 1.64               | 430                   | 0.62     | 0.80               |
| 0.1 | 2.54               | 670                   | 0.76     | 0.70               |
| 0.8 | 3.42               | 460                   | 0.65     | 0.84               |
| 1   | 2.53               | 545                   | 0.73     | 0.80               |

Fitting parameter  $R_e$  represents the internal resistance of the test battery,  $R_{ct}$  and  $C_{ct}$  are associated with the charge-transfer resistance and constant phase element of the electrode/electrolyte interface, and  $Z_w$  represents Warburg impedance corresponding to the lithium diffusion process.

**Figure S6.** *Ex situ* XRD patterns of  $x = 0$  (GeS), 0.1, 0.4, 0.8, and 1 (SnS) of  $\text{Sn}_x\text{Ge}_{1-x}\text{S}$  electrodes after 70 discharge/charge cycles.

The GeS pattern contains peaks at  $32.3^\circ$  and  $35.6^\circ$ , which are assigned to the (201) and (211) planes of metastable tetragonal phase (ST12) Ge (JCPDS No. 72-1425;  $a = 5.93 \text{ \AA}$  and  $c = 6.98 \text{ \AA}$ ), respectively. As the cycle number increases, the peak intensity gradually decreases and the peak width increases. The SnS pattern contains peaks at  $23.7^\circ$  and  $39.2^\circ$ , which are matched to the (111) and (220) planes of cubic phase ( $\alpha$ ) Sn (JCPDS No. 87-0794;  $a = 6.489 \text{ \AA}$ ), respectively. The weak peaks at  $30.5^\circ$  and  $31.9^\circ$  correspond to the (200) and (101) planes of tetragonal ( $\beta$ ) Sn (JCPDS No. 86-2265;  $a = 5.831 \text{ \AA}$ ,  $c = 3.181 \text{ \AA}$ ), respectively. For  $x = 0.1$ , the ST12 peaks appear, with weaker intensity and broader width compared to those of GeS. In the case of  $x = 0.4$ , there are no assignable peaks. As  $x$  increased to 0.8, the (111) peaks of  $\alpha$ -Sn emerged with a blue shift ( $24.1^\circ$ ), indicating Sn-Ge alloy formation. The Sn composition ( $x$ ) of  $\text{Sn}_x\text{Ge}_{1-x}$  was determined to be 0.85, using Vegard's law (*i.e.*,  $d = (1 - x)d_{\text{Ge}} + xd_{\text{Sn}}$ ) based on the (111) peak position of the end members; *i.e.*,  $27.1^\circ$  for cubic Ge (JCPDS No. 04-0545;  $a = 5.6576 \text{ \AA}$ ).

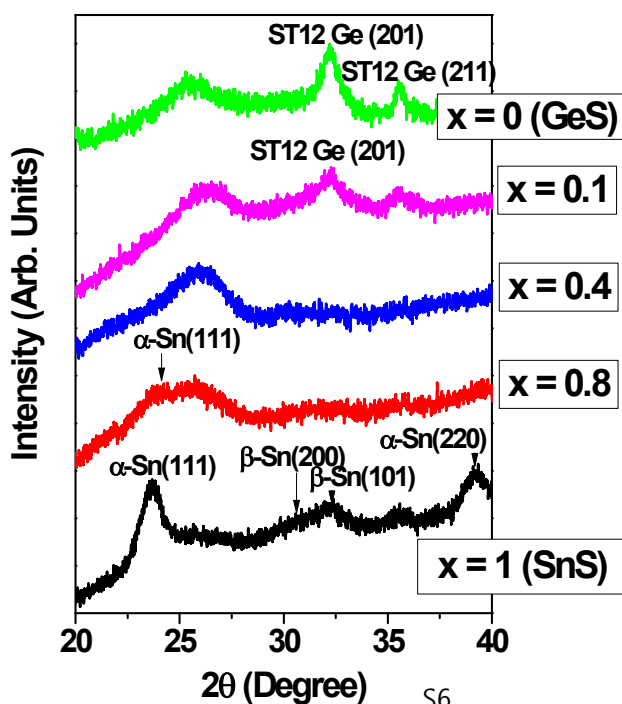

Supplement: c4ra08886g1.pdf [file c4ra08886g1.pdf]
